# Supplementary material
Source: PubMed Central journal article supplement (PMC4648820)
Supplement: MCB.00757-15_zmb999101051so7.pdf [file MCB.00757-15_zmb999101051so7.pdf]

| Accession   | Gene Symbol     | Name                                                                   | Score |
|-------------|-----------------|------------------------------------------------------------------------|-------|
| IPI00786995 | LOC731751       | similar to DNA dependent protein kinase catalytic subunit              | 167   |
| IPI00643722 | ARID1A          | Isoform 1 of AT-rich interactive domain-containing protein 1A          | 271   |
| IPI00069084 | TRRAP           | Transformation/transcription domain-associated protein                 | 73    |
| IPI00290652 | RSF1            | Remodeling and spacing factor 1                                        | 66    |
| IPI00903319 | ATXN1           | Ataxin-1                                                               | 53    |
| IPI00292771 | NUMA1           | Isoform 1 of Nuclear mitotic apparatus protein 1                       | 35    |
| IPI00019502 | MYH9            | Isoform 1 of Myosin-9                                                  | 462   |
| IPI00470805 | MDC1            | Mediator of DNA damage checkpoint protein 1                            | 73    |
| IPI00029822 | SMARCA          | SWI/SNF-related matrix-associated actin-dependent regulator of chrom   | 32    |
| IPI0000849  | SPRR2           | Small proline-rich protein 2                                           | 37    |
| IPI00026970 | SUPT16H         | FACT complex subunit SPT16                                             | 436   |
| IPI00305282 | RAD50           | Isoform 1 of DNA repair protein RAD50                                  | 63    |
| IPI00185146 | IPO9            | Importin-9                                                             | 946   |
| IPI00449049 | PARP1           | Poly [ADP-ribose] polymerase 1                                         | 206   |
| IPI00909008 | DDB1            | DNA damage-binding protein 1                                           | 40    |
| IPI00449049 | PARP1           | Poly [ADP-ribose] polymerase 1                                         | 246   |
| IPI00903319 | ATXN1           | Ataxin-1                                                               | 68    |
| IPI00008477 | TPX2            | Targeting protein for Xklp2                                            | 49    |
| IPI00005154 | SSRP1           | FACT complex subunit SSRP1                                             | 477   |
| IPI00871391 | XRCC5           | Putative uncharacterized protein XRCC5                                 | 104   |
| IPI00165536 | KAT5            | highly similar to Histone acetyltransferase HTATIP                     | 58    |
| IPI00217467 | HIST1H1         | Histone H1                                                             | 64    |
| IPI00001639 | KPNB1           | Importin subunit beta-1                                                | 32    |
| IPI00009104 | RUVBL2          | RuvB-like 2                                                            | 1011  |
| IPI00021187 | RUVBL1          | Isoform 1 of RuvB-like 1                                               | 669   |
| IPI00006167 | PPM1G           | Protein phosphatase 1G                                                 | 313   |
| IPI00640417 | HP1BP3          | Heterochromatin protein 1-binding protein 3                            | 44    |
| IPI00216230 | TMPO            | Lamina-associated polypeptide 2, isoform alpha                         | 37    |
| IPI00020127 | RPA1            | Replication protein A 70 kDa DNA-binding subunit                       | 257   |
| IPI00893179 | XRCC6           | X-ray repair complementing defective repair in Chinese hamster cells 6 | 55    |
| IPI00103554 | GATAD2B         | Transcriptional repressor p66-beta                                     | 50    |
| IPI00020127 | RPA1            | Replication protein A 70 kDa DNA-binding subunit                       | 60    |
| IPI00829697 |                 | Uncharacterized protein ENSP00000375030                                | 60    |
| IPI00887974 | LOC646057       | similar to hCG2042717                                                  | 48    |
| IPI00645452 | TUBB            | Tubulin, beta polypeptide                                              | 44    |
| IPI00887974 | LOC646057       | similar to hCG2042717                                                  | 57    |
| IPI00894498 | ACTB            | Beta actin variant (Fragment)                                          | 381   |
| IPI00894365 | ACTB            | highly similar to Actin, cytoplasmic 1                                 | 381   |
| IPI00021440 | ACTG1           | Actin, cytoplasmic 2                                                   | 378   |
| IPI00028888 | HNRNPD          | Heterogeneous nuclear ribonucleoprotein D0                             | 71    |
| IPI00012066 | PCBP            | poly(rC) binding protein                                               | 37    |
| IPI00017412 | RFC2            | Isoform 1 of Replication factor C subunit 2                            | 252   |
| IPI00742926 | HNRNPAB         | Heterogeneous nuclear ribonucleoprotein A/B                            | 230   |
| IPI00016610 | PCBP1           | Poly(rC)-binding protein 1                                             | 97    |
| IPI00031521 | RFC3            | Replication factor C subunit 3                                         | 81    |
| IPI00045051 | PURB            | Transcriptional activator protein Pur-beta                             | 75    |
| IPI00792595 | RFC4            | Replication factor C subunit 4                                         | 71    |
| IPI00216592 | HNRNPC          | Heterogeneous nuclear ribonucleoproteins C1/C2                         | 39    |
| IPI00216689 | PCBP2           | Poly(rC)-binding protein 2                                             | 39    |
| IPI00017381 | RFC4            | Replication factor C subunit 4                                         | 124   |
| IPI00219217 | LDHB            | L-lactate dehydrogenase B chain                                        | 107   |
| IPI00217467 | HIST1H1         | Histone H1                                                             | 66    |
| IPI00217465 | HIST1H1C        | Histone H1.2                                                           | 66    |
| IPI00742926 | HNRNPAB         | Heterogeneous nuclear ribonucleoprotein A/B                            | 46    |
| IPI00217467 | HIST1H1         | Histone H1                                                             | 72    |
| IPI00419983 | HIST1H1T        | Histone H1t                                                            | 72    |
| IPI00217467 | HIST1H1E        | Histone H1.4                                                           | 88    |
| IPI00217465 | HIST1H1C        | Histone H1.2                                                           | 88    |
| IPI00217467 | HIST1H1E        | Histone H1.4                                                           | 98    |
| IPI00013939 | RPA2            | Replication protein A 32 kDa subunit                                   | 62    |
| IPI00470438 | C1orf77         | Chromosome 1 open reading frame 77                                     | 119   |
| IPI00217467 | HIST1H1E        | Histone H1.4                                                           | 103   |
| IPI00021924 | H1FX            | Histone H1x                                                            | 76    |
| IPI00419983 | HIST1H1T        | Histone H1t                                                            | 66    |
| IPI00646957 | RPA2            | Replication protein A2, 32kDa                                          | 31    |
| IPI00217467 | HIST1H1         | Histone H1                                                             | 44    |
| IPI00887982 | LOC391774       | similar to hCG1781941                                                  | 36    |
| IPI00045109 | HIST1H2AA or H  | Histone H2A type 1-A or Histone H2A.x                                  | 60    |
| IPI00376572 | MRCL or MYL9    | Myosin regulatory light chain or Myosin regulatory light polypeptide 9 | 84    |
| IPI00152906 | Etc             | Histone H2B                                                            | 81    |
| IPI00217466 | HIST1H1D or H1I | Histone H1.3 or Histone H1.4                                           | 62    |
| IPI00217465 | HIST1H1C        | Histone H1.2                                                           | 62    |
| IPI00018842 | HMGN            | High mobility group nucleosome-binding domain-containing protein       | 52    |
| IPI00177716 | HMGA1           | Isoform HMG-Y of High mobility group protein HMG-I/HMG-Y               | 49    |
| IPI00152906 | Etc             | Histone H2B                                                            | 425   |
| IPI00003935 | Etc             | Histone H2B                                                            | 415   |
| IPI00796366 | MYL6B           | 16 kDa protein                                                         | 184   |
| IPI00216457 | Etc             | Histone H2A                                                            | 129   |
| IPI00031562 | HIST3H2A or H1K | Histone H2A type 3 or Histone H2A type 1-B/E                           | 71    |
| IPI00003935 | Etc             | Histone H2B                                                            | 113   |

**Table S1** The list of identified proteins from H2AX complex after DNA damage
