# Supplementary material
Source: PubMed Central journal article supplement (PMC4648820)
Supplement: MCB.00757-15_zmb999101051so8.pdf [file MCB.00757-15_zmb999101051so8.pdf]

| Accession | Description                                                                                                                                          | Score | Σ# Peptides |
|-----------|------------------------------------------------------------------------------------------------------------------------------------------------------|-------|-------------|
| Q09666    | Neuroblast differentiation-associated protein AHNAK OS=Homo sapiens GN=AHNAK PE=1 SV=2                                                               | 346   | 349         |
| Q9Y4A5    | Transformation/transcription domain-associated protein OS=Homo sapiens GN=TRRAP PE=1 SV=2                                                            | 200   | 200         |
| P35579    | Myosin-9 OS=Homo sapiens GN=MYH9 PE=1 SV=4 - [MYH9_HUMAN]                                                                                            | 167   | 167         |
| P78527    | DNA-dependent protein kinase catalytic subunit OS=Homo sapiens GN=PRKDC PE=1 SV=3 - [PRKDC_HUMAN]                                                    | 132   | 132         |
| Q96L91    | E1A-binding protein p400 OS=Homo sapiens GN=EP400 PE=1 SV=3 - [EP400_HUMAN]                                                                          | 116   | 116         |
| Q14980    | Nuclear mitotic apparatus protein 1 OS=Homo sapiens GN=NUMA1 PE=1 SV=2 - [NUMA1_HUMAN]                                                               | 112   | 112         |
| Q5UIP0    | Telomere-associated protein RIF1 OS=Homo sapiens GN=RIF1 PE=1 SV=2 - [RIF1_HUMAN]                                                                    | 85    | 85          |
| Q8IWI9    | MAX gene-associated protein OS=Homo sapiens GN=MGA PE=1 SV=2 - [MGAP_HUMAN]                                                                          | 78    | 78          |
| Q93008    | Probable ubiquitin carboxyl-terminal hydrolase FAF-X OS=Homo sapiens GN=USP9X PE=1 SV=2 - [USP9X_HUMAN]                                              | 63    | 76          |
| O75643    | U5 small nuclear ribonucleoprotein 200 kDa helicase OS=Homo sapiens GN=SNRNP200 PE=1 SV=2 - [SNRNP200_HUMAN]                                         | 52    | 53          |
| Q52LR7    | Enhancer of polycomb homolog 2 OS=Homo sapiens GN=EPC2 PE=1 SV=2 - [EPC2_HUMAN]                                                                      | 48    | 51          |
| Q15058    | Kinesin-like protein KIF14 OS=Homo sapiens GN=KIF14 PE=1 SV=1 - [KIF14_HUMAN]                                                                        | 47    | 47          |
| Q9Y2W1    | Thyroid hormone receptor-associated protein 3 OS=Homo sapiens GN=THRAP3 PE=1 SV=2 - [THRAP3_HUMAN]                                                   | 46    | 47          |
| O14974    | Protein phosphatase 1 regulatory subunit 12A OS=Homo sapiens GN=PPP1R12A PE=1 SV=1 - [PPP1R12A_HUMAN]                                                | 45    | 45          |
| Q9H0E9    | Bromodomain-containing protein 8 OS=Homo sapiens GN=BRD8 PE=1 SV=1 - [BRD8_HUMAN]                                                                    | 45    | 45          |
| O75376    | Nuclear receptor corepressor 1 OS=Homo sapiens GN=NCOR1 PE=1 SV=2 - [NCOR1_HUMAN]                                                                    | 44    | 49          |
| P11388    | DNA topoisomerase 2-alpha OS=Homo sapiens GN=TOP2A PE=1 SV=3 - [TOP2A_HUMAN]                                                                         | 43    | 51          |
| Q92993    | Histone acetyltransferase KAT5 OS=Homo sapiens GN=KAT5 PE=1 SV=2 - [KAT5_HUMAN]                                                                      | 39    | 40          |
| Q9Y230    | RuvB-like 2 OS=Homo sapiens GN=RUVBL2 PE=1 SV=3 - [RUVBL2_HUMAN]                                                                                     | 37    | 37          |
| Q6WCQ1    | Myosin phosphatase Rho-interacting protein OS=Homo sapiens GN=MPRIP PE=1 SV=3 - [MPRIP_HUMAN]                                                        | 37    | 37          |
| Q9NQW6    | Actin-binding protein anillin OS=Homo sapiens GN=ANLN PE=1 SV=2 - [ANLN_HUMAN]                                                                       | 36    | 36          |
| O60264    | SWI/SNF-related matrix-associated actin-dependent regulator of chromatin subfamily A member 1 OS=Homo sapiens GN=SMARCA4 PE=1 SV=2 - [SMARCA4_HUMAN] | 36    | 36          |
| Q9H2F5    | Enhancer of polycomb homolog 1 OS=Homo sapiens GN=EPC1 PE=1 SV=1 - [EPC1_HUMAN]                                                                      | 34    | 37          |
| Q9Y265    | RuvB-like 1 OS=Homo sapiens GN=RUVBL1 PE=1 SV=1 - [RUVBL1_HUMAN]                                                                                     | 33    | 33          |
| Q08211    | ATP-dependent RNA helicase A OS=Homo sapiens GN=DHX9 PE=1 SV=4 - [DHX9_HUMAN]                                                                        | 30    | 30          |
| P38398    | Breast cancer type 1 susceptibility protein OS=Homo sapiens GN=BRCA1 PE=1 SV=2 - [BRCA1_HUMAN]                                                       | 30    | 30          |
| O00571    | ATP-dependent RNA helicase DDX3X OS=Homo sapiens GN=DDX3X PE=1 SV=3 - [DDX3X_HUMAN]                                                                  | 26    | 27          |
| P60709    | Actin, cytoplasmic 1 OS=Homo sapiens GN=ACTB PE=1 SV=1 - [ACTB_HUMAN]                                                                                | 24    | 24          |
| P09651    | Heterogeneous nuclear ribonucleoprotein A1 OS=Homo sapiens GN=HNRNPA1 PE=1 SV=5 - [HNRNPA1_HUMAN]                                                    | 20    | 24          |
| Q92878    | DNA repair protein RAD50 OS=Homo sapiens GN=RAD50 PE=1 SV=1 - [RAD50_HUMAN]                                                                          | 11    | 11          |
| P25490    | Transcriptional repressor protein YY1 OS=Homo sapiens GN=YY1 PE=1 SV=2 - [YY1_HUMAN]                                                                 | 7     | 7           |
| Q9NPI1    | Bromodomain-containing protein 7 OS=Homo sapiens GN=BRD7 PE=1 SV=1 - [BRD7_HUMAN]                                                                    | 7     | 7           |
| O15144    | Actin-related protein 2/3 complex subunit 2 OS=Homo sapiens GN=ARPC2 PE=1 SV=1 - [ARPC2_HUMAN]                                                       | 5     | 5           |
| Q14676    | Mediator of DNA damage checkpoint protein 1 OS=Homo sapiens GN=MDC1 PE=1 SV=3 - [MDC1_HUMAN]                                                         | 5     | 5           |
| P07437    | Tubulin beta chain OS=Homo sapiens GN=TUBB PE=1 SV=2 - [TUBB_HUMAN]                                                                                  | 2     | 24          |

**Table S2** The list of identified proteins from TIP60 complex after DNA damage
