# Supplementary material
Source: PubMed Central journal article supplement (PMC4648820)

A

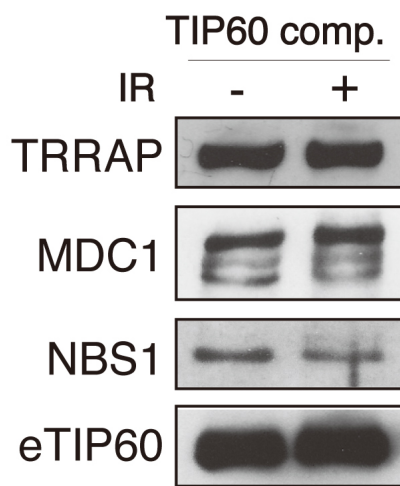

B

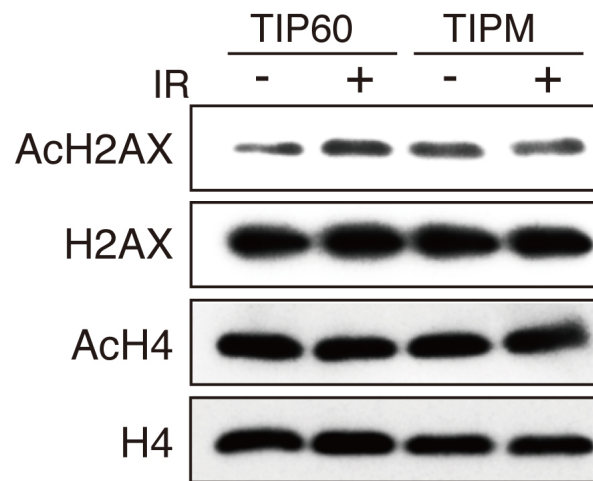

Sup.Figure 1 Ikura, M. et al.

Supplement: MCB.00757-15_zmb999101051so1.pdf [file MCB.00757-15_zmb999101051so1.pdf]

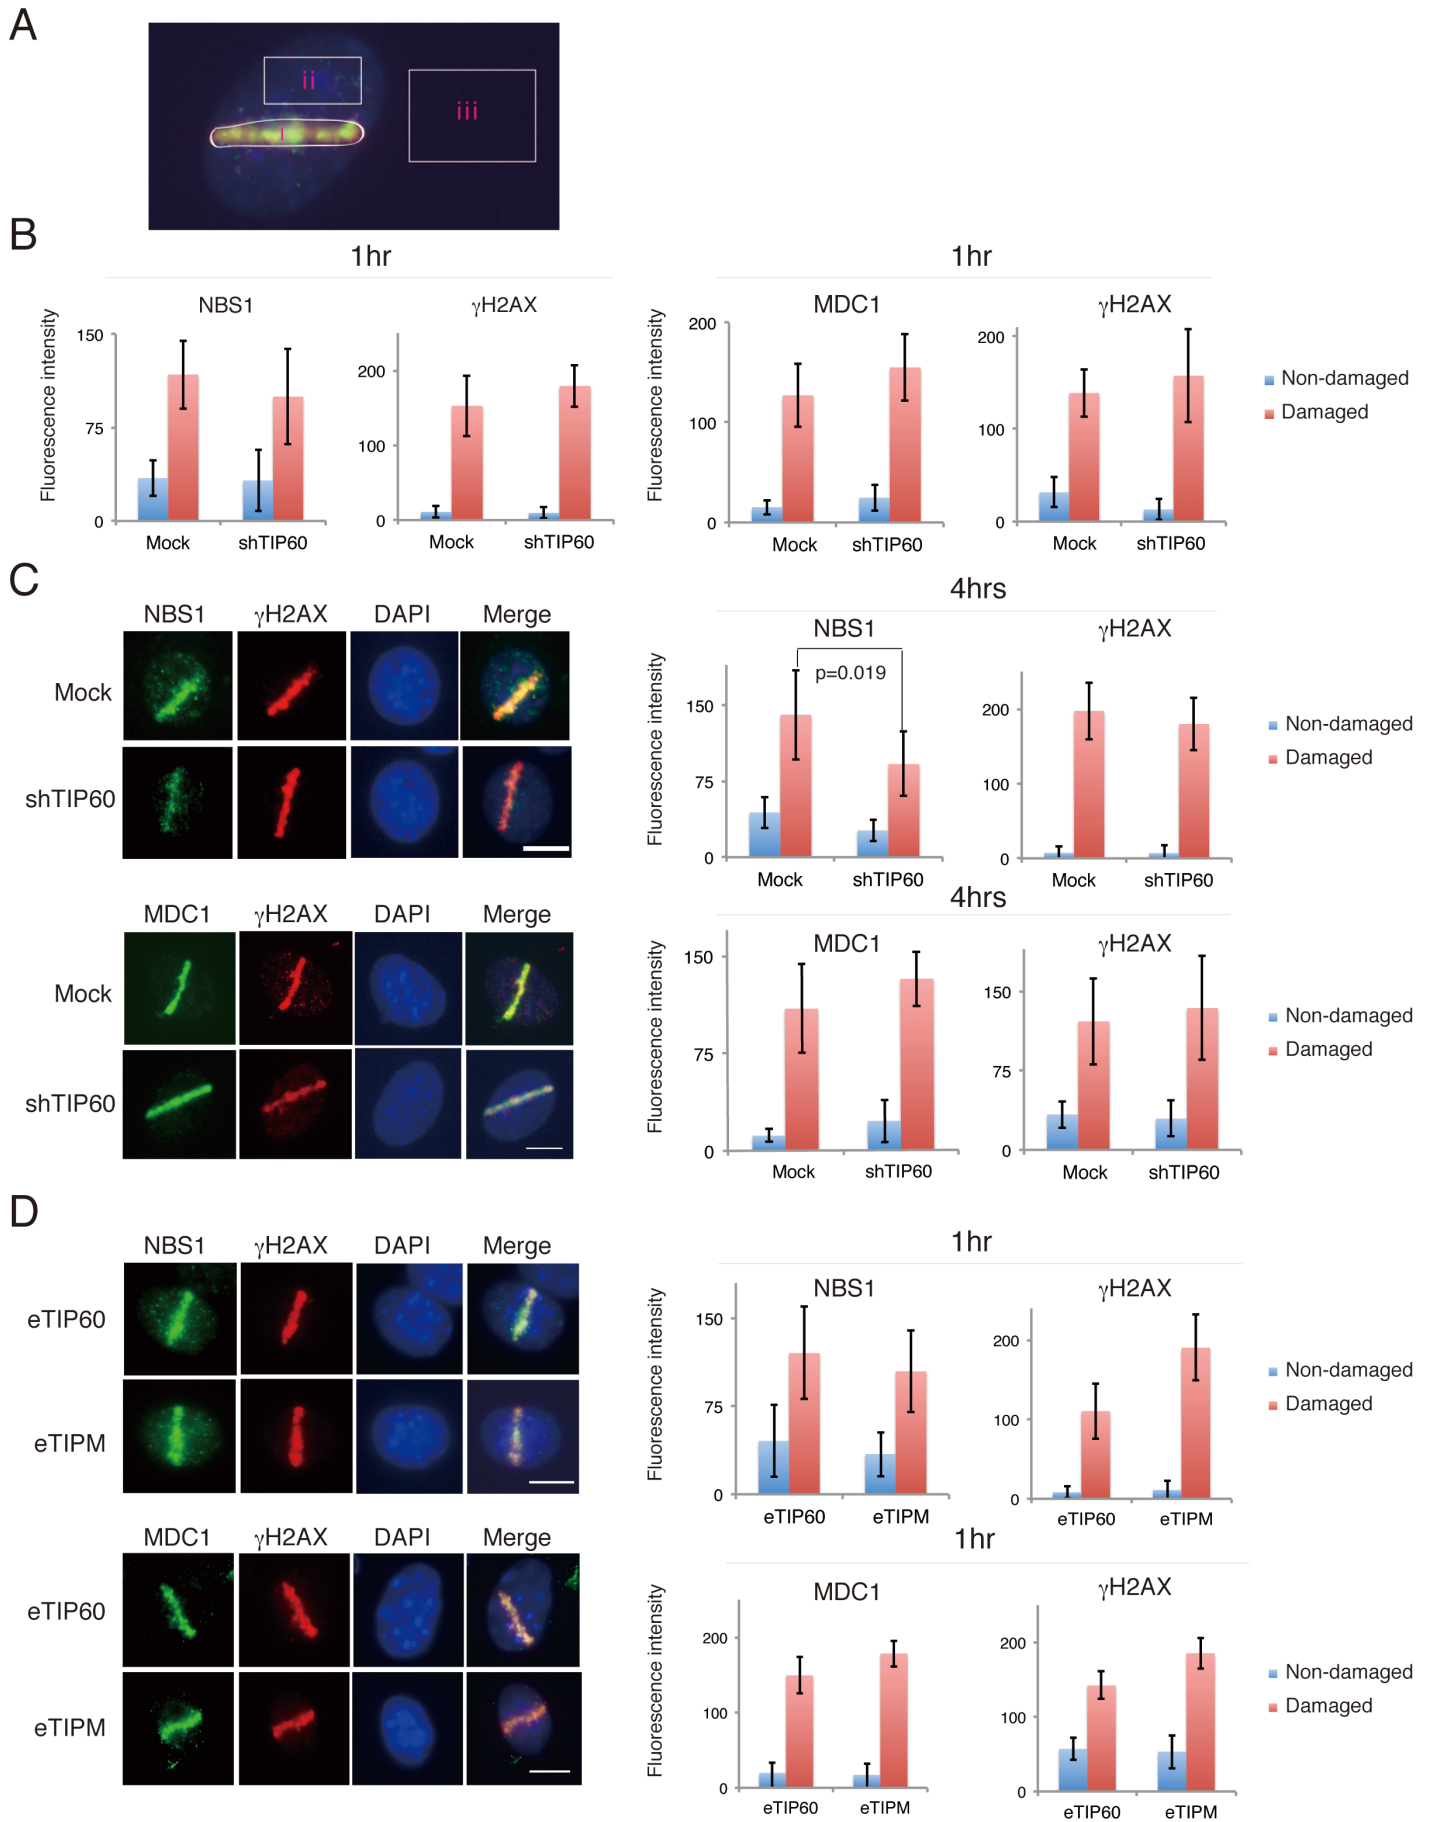

Sup.Figure 2 Ikura, M. et al No1.

Supplement: MCB.00757-15_zmb999101051so3.pdf [file MCB.00757-15_zmb999101051so3.pdf]

E

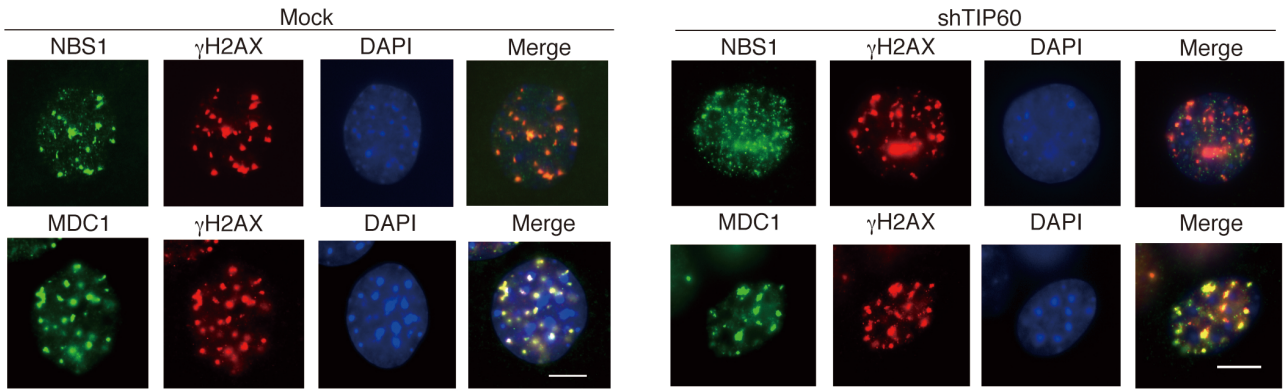

F

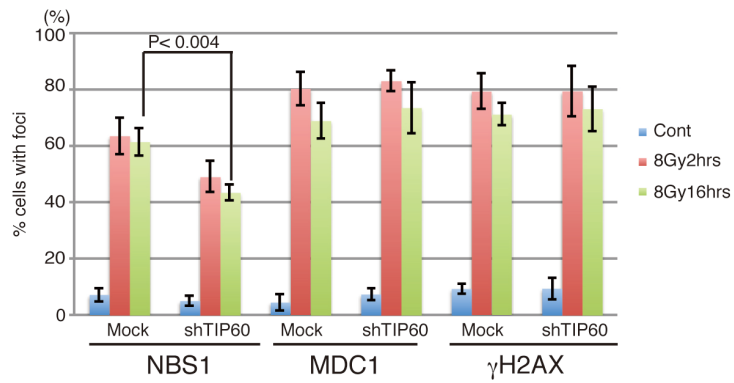

G

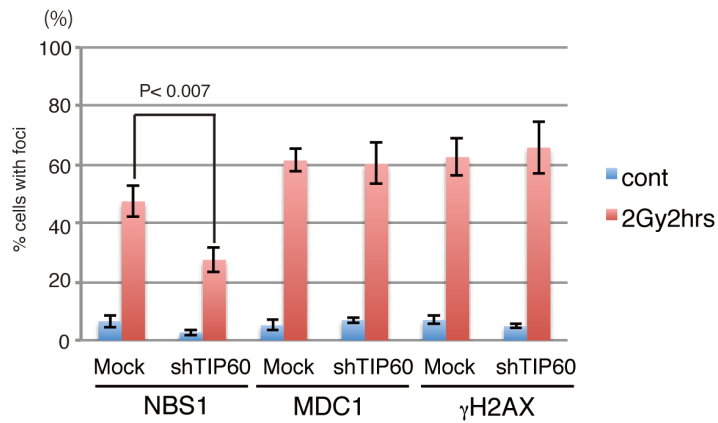

H

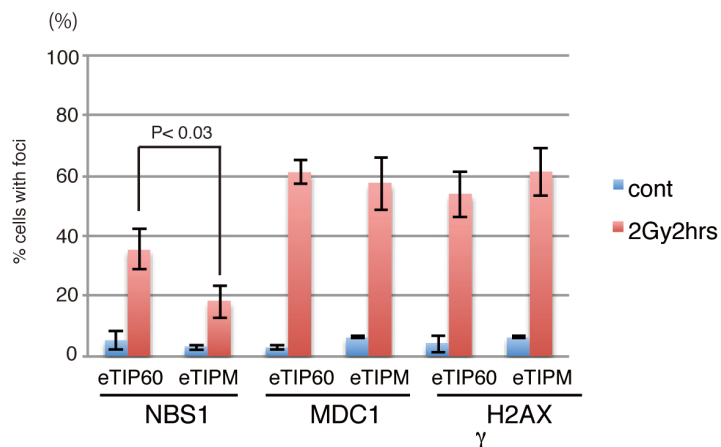

Supplement: MCB.00757-15_zmb999101051so4.pdf [file MCB.00757-15_zmb999101051so4.pdf]

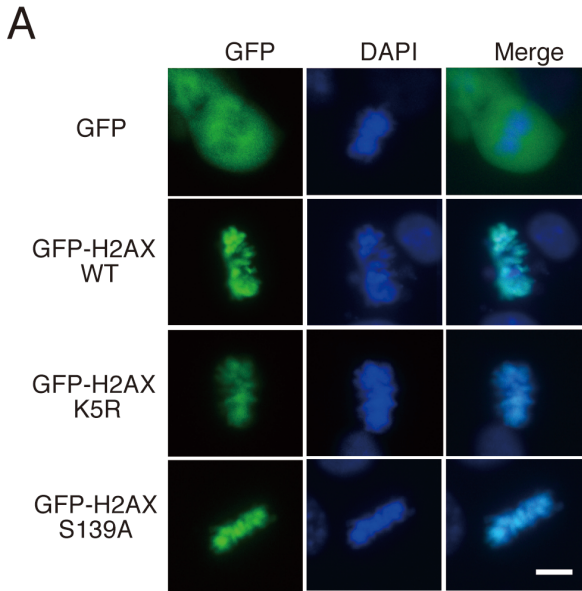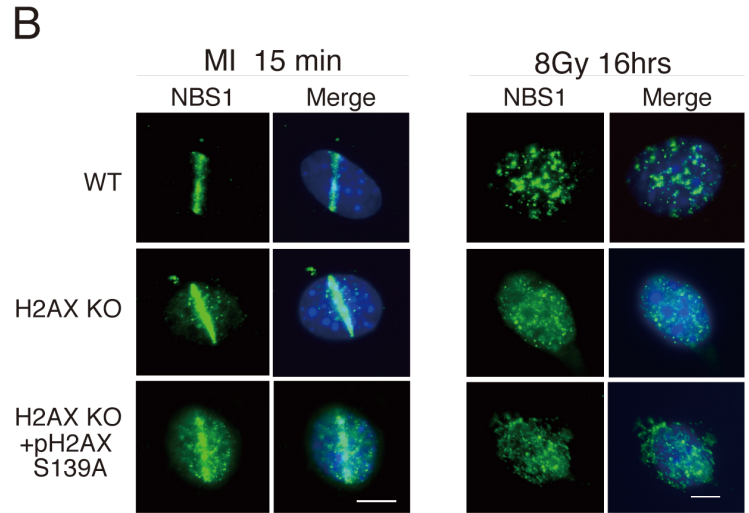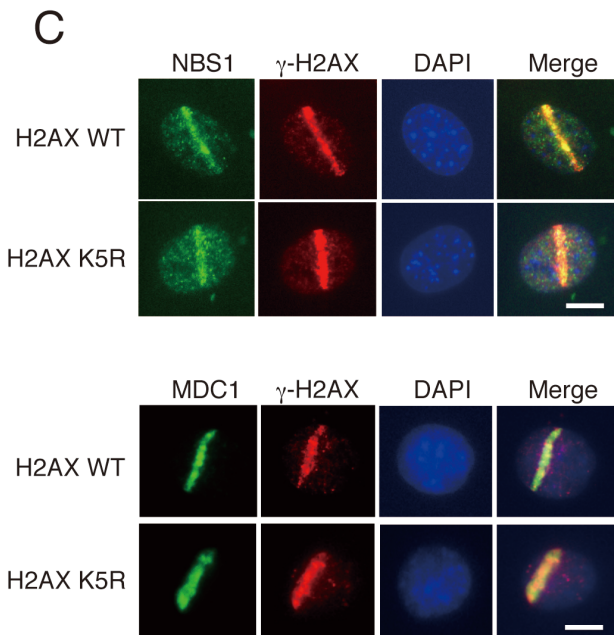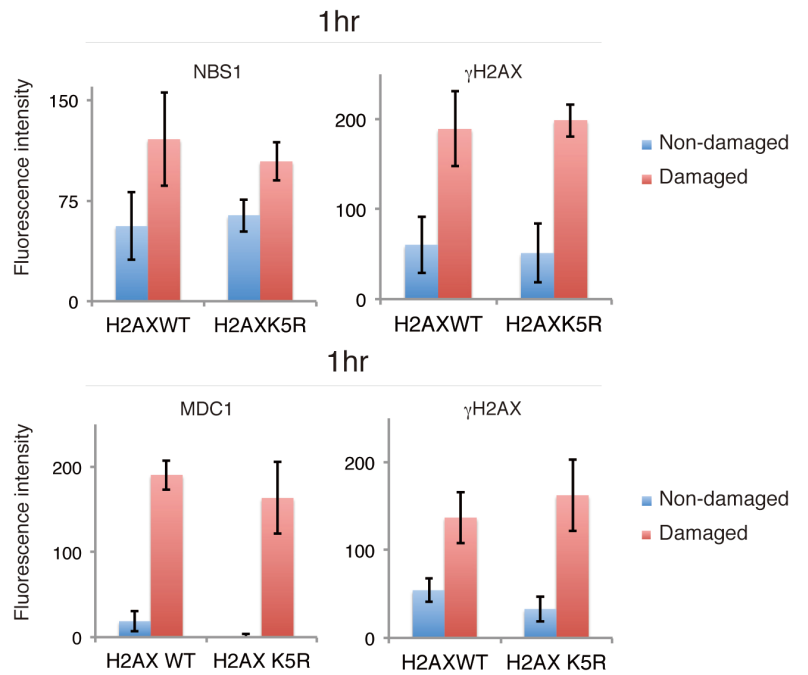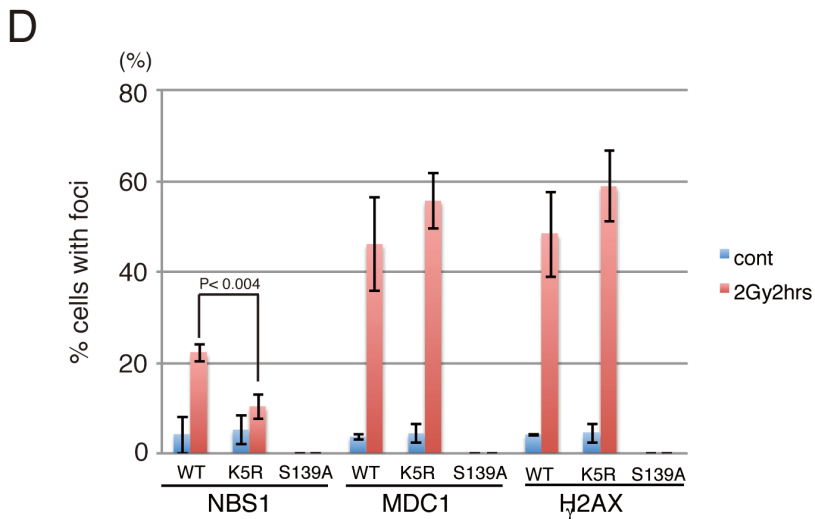

Sup.Figure 3 Ikura, M. et al.

Supplement: MCB.00757-15_zmb999101051so5.pdf [file MCB.00757-15_zmb999101051so5.pdf]

# NBS1-GFP

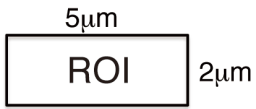

Intensity=ROI-Background

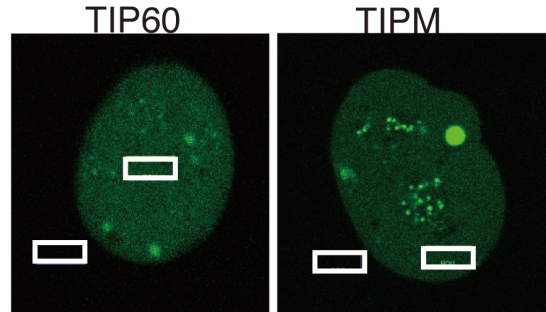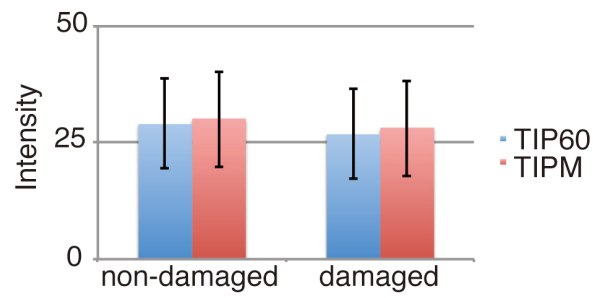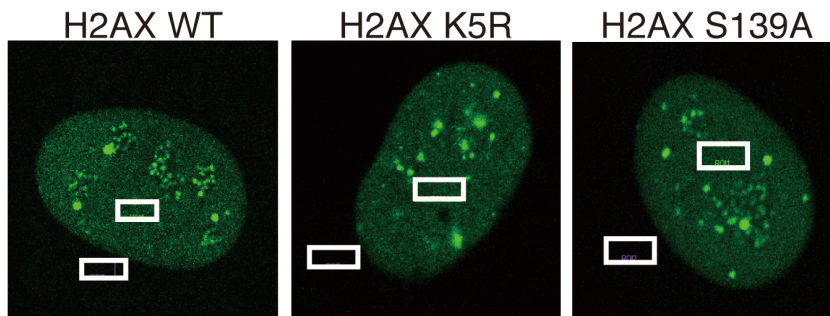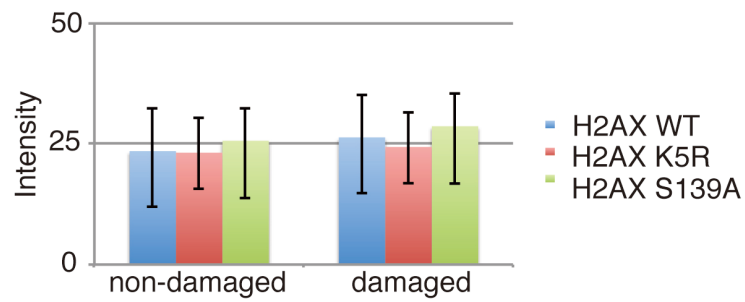

Supplement: MCB.00757-15_zmb999101051so6.pdf [file MCB.00757-15_zmb999101051so6.pdf]
